# Supplementary material for: Comparison of the photocatalytic activity of novel hybrid photocatalysts based on phthalocyanines, subphthalocyanines and porphyrins immobilized onto nanoporous gold
Source: Royal Society of Chemistry journal article supplement (doi:10.1039/d1ra01331a), 2021-01-01
Supplement: d1ra01331a1.pdf [file d1ra01331a1.pdf]

## Supporting Information

### Comparison of the photocatalytic activity of novel hybrid photocatalysts based on phthalocyanines, subphthalocyanines and porphyrins immobilized onto nanoporous gold

David Steinebrunner,<sup>[a,b]</sup> Günter Schnurpfeil,<sup>[c]</sup> Jan Thayssen,<sup>[a,b,d]</sup> Jorge Adrian Tapia Burgos,<sup>[a,b]</sup> Andre Wichmann,<sup>[a]</sup> Dieter Wöhrle,<sup>\*[c]</sup> and Arne Wittstock<sup>\*[a,b]</sup>

<sup>a</sup> Institute of Applied and Physical Chemistry and Center for Environmental Research and Sustainable Technology, University Bremen, Leobener Str. UFT, 28359 Bremen, Germany.

<sup>b</sup> MAPEX Center for Materials and Processes, University Bremen, Bibliothekstr. 1, 28359 Bremen, Germany.

<sup>c</sup> Organic and Macromolecular Chemistry, University Bremen, Leobener Str. NW2, 28359 Bremen, Germany.

<sup>d</sup> Institute for Organic and Analytical Chemistry, University Bremen, Leobener Str. UFT, 28359 Bremen, Germany.

#### ESI-1 Determination of immobilized photosensitizer on npAu:

For the determination of the quantity of immobilized photosensitizer, 10 mg of the as prepared hybrid material was dissolved in ultra pure *aqua regia* (2 mL) and subjected to ICP-MS measurements. The quantities of the immobilized photosensitizers were then calculated from the concentrations of the central ion (Zn or B, Table S1) determined by ICP-MS. From the obtained amounts, the fractions of irradiated photosensitizer were calculated according to a literature procedure based on the penetration depth of visible light into the npAu material of 300 nm (Table S1).<sup>[1]</sup>

The amounts of irradiated photosensitizer were used for further quantification of the photocatalytic activities by calculation of the corresponding turnover numbers (TON, [converted DPF] (mol) / [irradiated photosensitizer] (mol)) and turnover frequencies (TOF, slope of the plot TON vs. reaction time (min<sup>-1</sup>)).

**Table. S1:** Overview over the different hybrid systems prepared by immobilization of the photosensitizer onto npAu. Hybrid – abbreviation used in the text for the corresponding hybrid system, Sensitizer<sub>npAu</sub> – immobilized sensitizer content given as µg/g hybrid catalyst as determined by ICP-MS measurements, and Sensitizer<sub>irr.</sub> – determined photosensitizer amount immobilized on npAu and irradiated during the photocatalytic measurements.

| Hybrid<br>(Sensitizer on npAu):    | H1<br>(ZnPc-3)          | H2<br>(ZnPc-6)          | H3<br>(ZnTPP-3)         | H6<br>(ZnTPP-6)         | H7<br>(BsubPc-3)        | H8<br>(BsubPc-6)        | H9<br>(BsubPc-11)       |
|------------------------------------|-------------------------|-------------------------|-------------------------|-------------------------|-------------------------|-------------------------|-------------------------|
| Sensitizer <sub>npAu</sub> [µg/g]: | 165.9                   | 156.7                   | 100.7                   | 117.6                   | 601.1                   | 406.2                   | 394.3                   |
| Sensitizer <sub>irr.</sub> [mol]:  | 1.5 x 10 <sup>-10</sup> | 1.4 x 10 <sup>-10</sup> | 1.0 x 10 <sup>-10</sup> | 1.1 x 10 <sup>-10</sup> | 5.5 x 10 <sup>-10</sup> | 3.7 x 10 <sup>-10</sup> | 3.6 x 10 <sup>-10</sup> |

### ESI-2 Supplementary data for the photooxidation of DPF with ZnPc-3

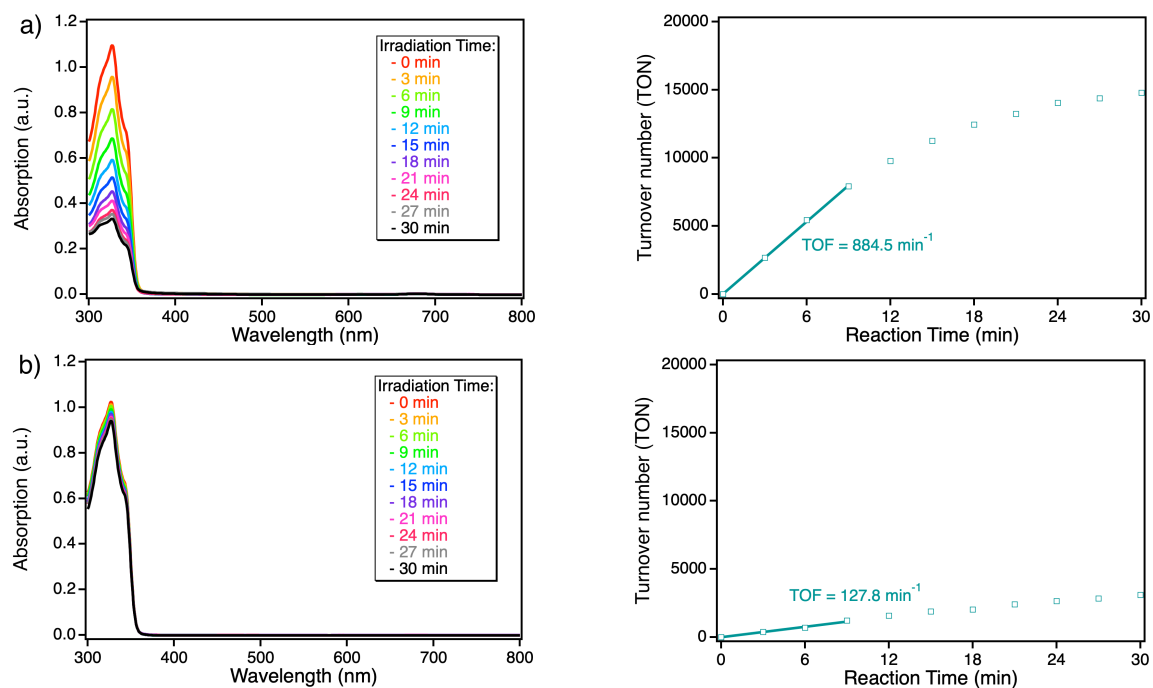

**Fig. S1:** UV-Vis spectra for the photooxidation of DPF with (a) **H1** as hybrid photocatalyst or (b) the photosensitizer ZnPc-3 (**1**,  $1 \times 10^{-10}$  mol) in solution.

### ESI-3 Supplementary data for the photooxidation of DPF with ZnPc-6

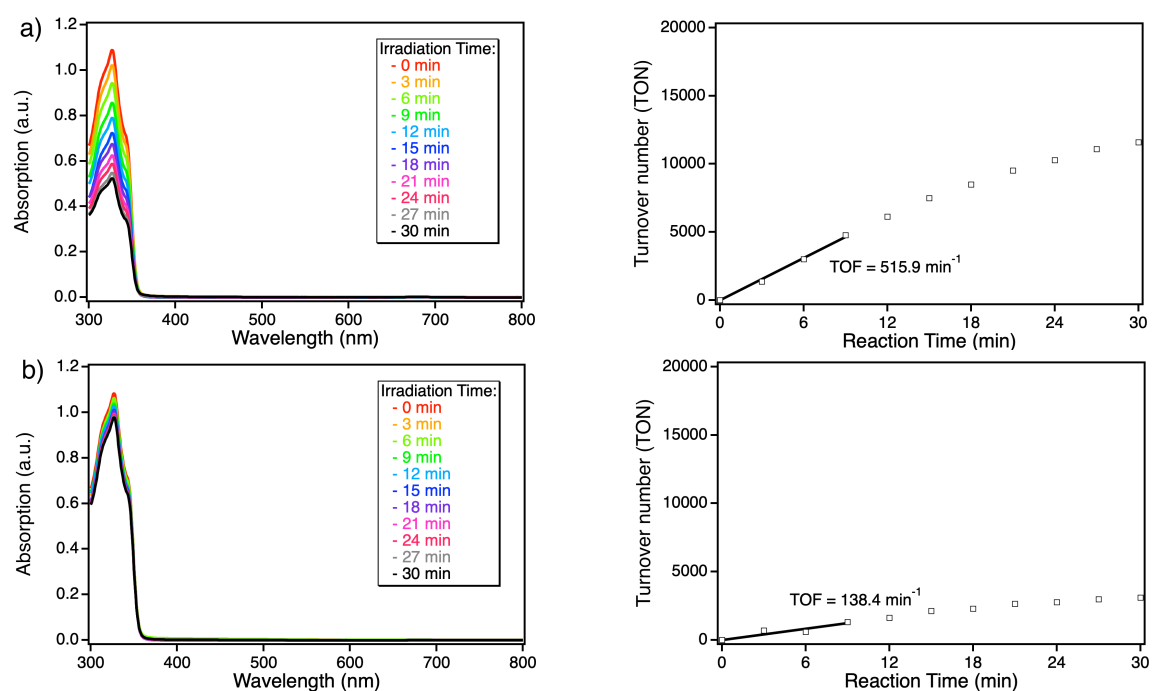

**Fig. S2:** UV-Vis spectra for the photooxidation of DPF with (a) **H2** as hybrid photocatalyst or (b) the photosensitizer ZnPc-6 (**2**,  $1 \times 10^{-10}$  mol) in solution.

### ESI-4 Supplementary data for the photooxidation of DPF with ZnTPP-3

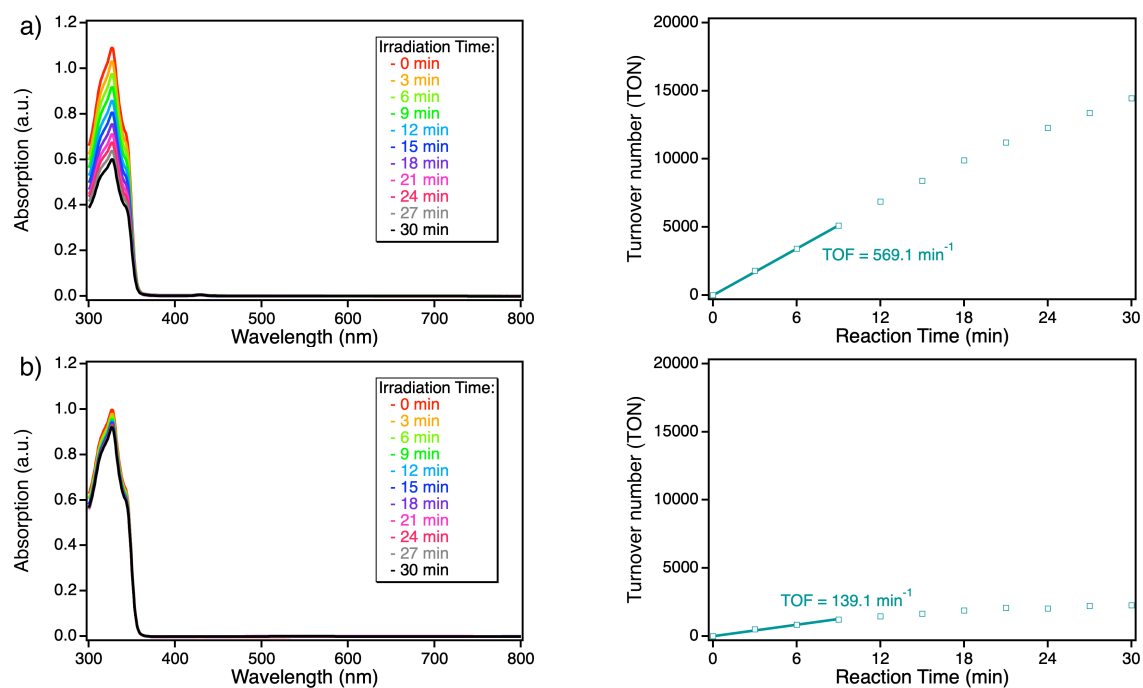

**Fig. S3:** UV-Vis spectra for the photooxidation of DPF with (a) **H3** as hybrid photocatalyst or (b) the photosensitizer ZnTPP-3 (**3**,  $1 \times 10^{-10}$  mol) in solution.

### ESI-5 Supplementary data for the photooxidation of DPF with H<sub>2</sub>TPP-6

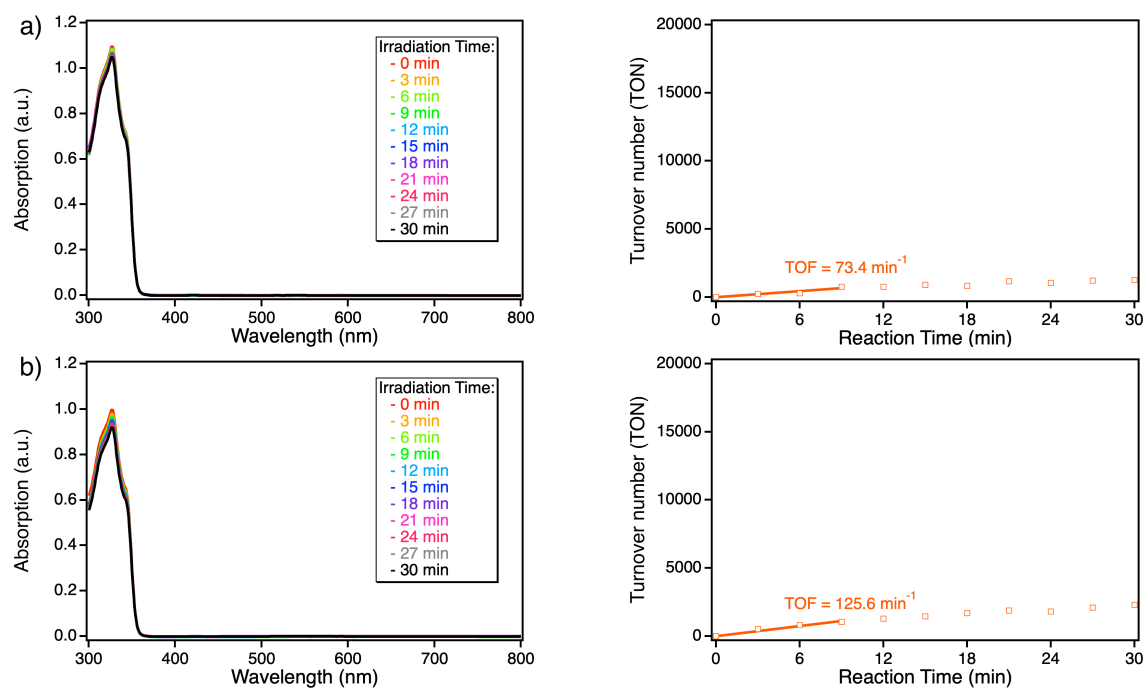

**Fig. S4:** UV-Vis spectra for the photooxidation of DPF with (a) **H4** as hybrid photocatalyst or (b) the photosensitizer H<sub>2</sub>TPP-6 (**4**,  $1 \times 10^{-10}$  mol) in solution.

### ESI-6 Supplementary data for the photooxidation of DPF with MgTPP-6

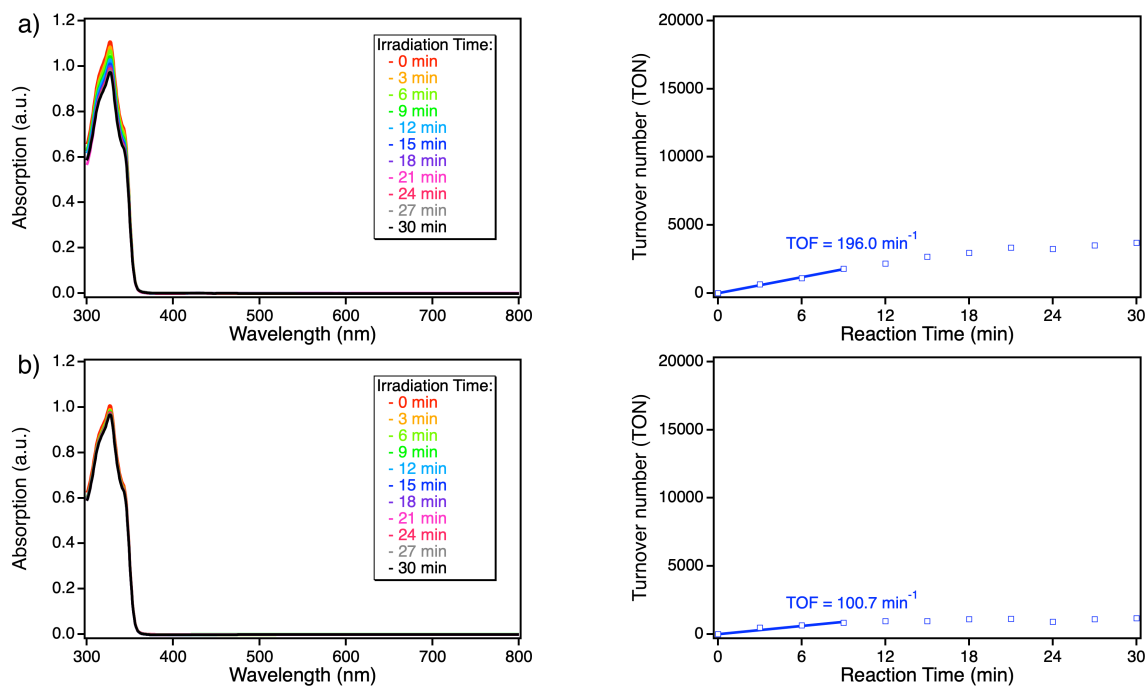

**Fig. S5:** UV-Vis spectra for the photooxidation of DPF with (a) H5 as hybrid photocatalyst or (b) the photosensitizer MgTPP-6 ( $5, 1 \times 10^{-10}$  mol) in solution.

### ESI-7 Supplementary data for the photooxidation of DPF with ZnTPP-6

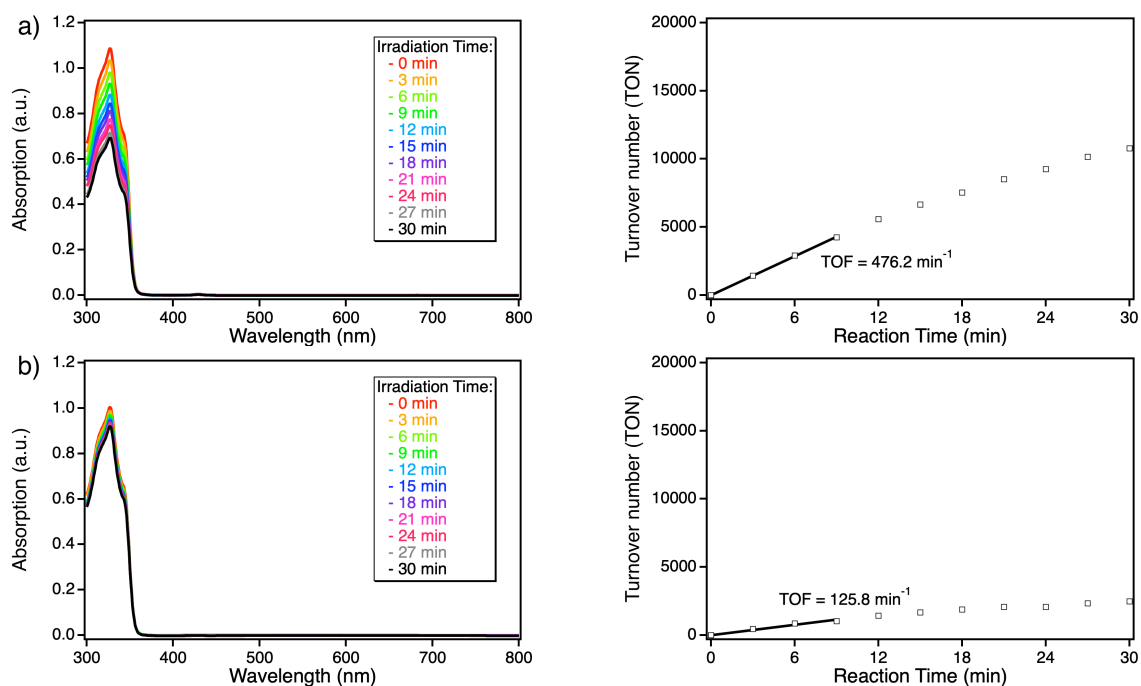

**Fig. S6:** UV-Vis spectra for the photooxidation of DPF with (a) H6 as hybrid photocatalyst or (b) the photosensitizer ZnTPP-6 ( $6, 1 \times 10^{-10}$  mol) in solution.

### ESI-8 Supplementary data for the photooxidation of DPF with BsubPc-3

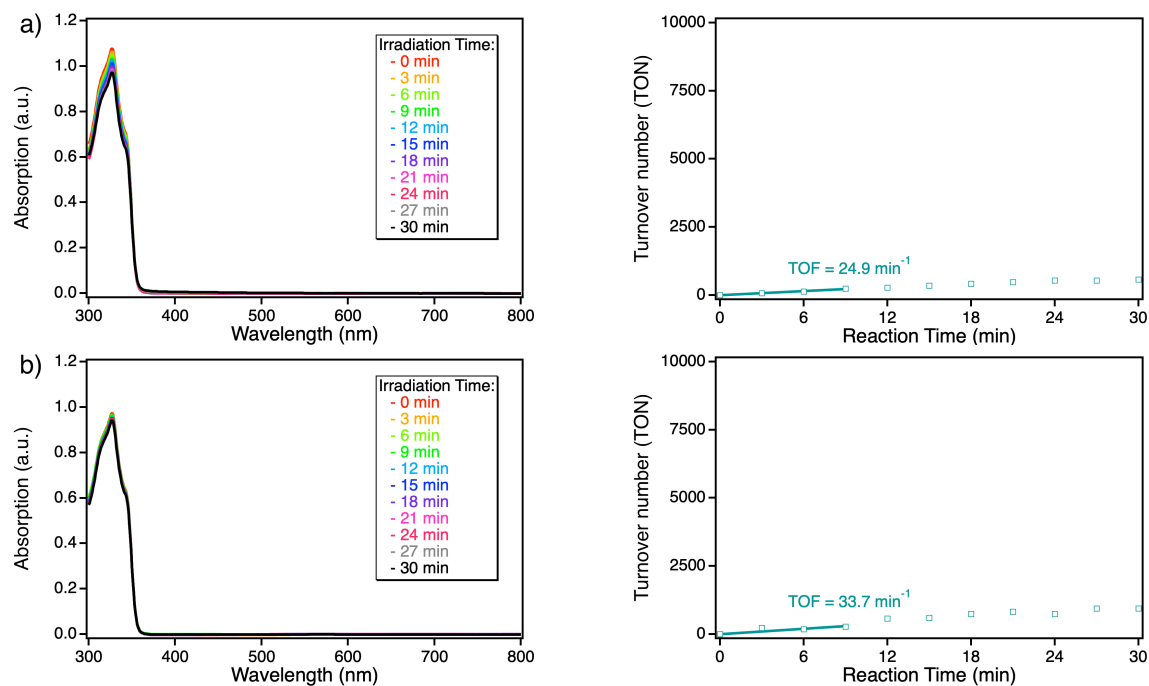

**Fig. S7:** UV-Vis spectra for the photooxidation of DPF with (a) **H7** as hybrid photocatalyst or (b) the photosensitizer BsubPc-3 (**7**,  $1 \times 10^{-10}$  mol) in solution.

### ESI-9 Supplementary data for the photooxidation of DPF with BsubPc-6

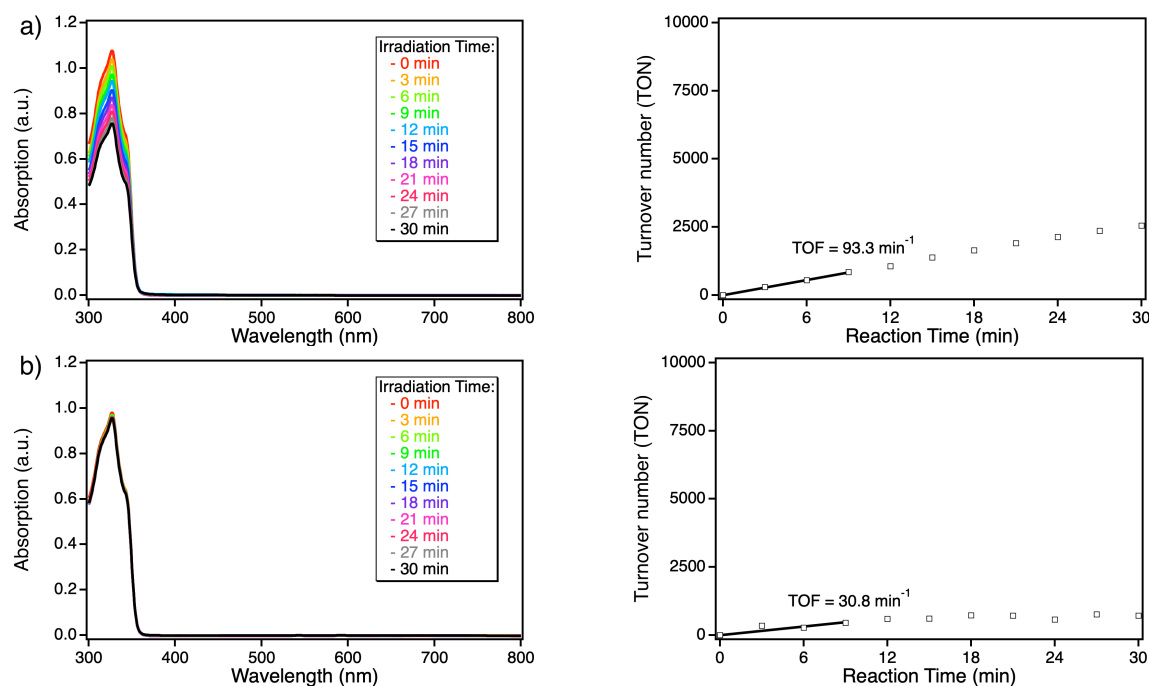

**Fig. S8:** UV-Vis spectra for the photooxidation of DPF with (a) **H8** as hybrid photocatalyst or (b) the photosensitizer BsubPc-6 (**8**,  $1 \times 10^{-10}$  mol) in solution.

## ESI-10 Supplementary data for the photooxidation of DPF with BsubPc-11

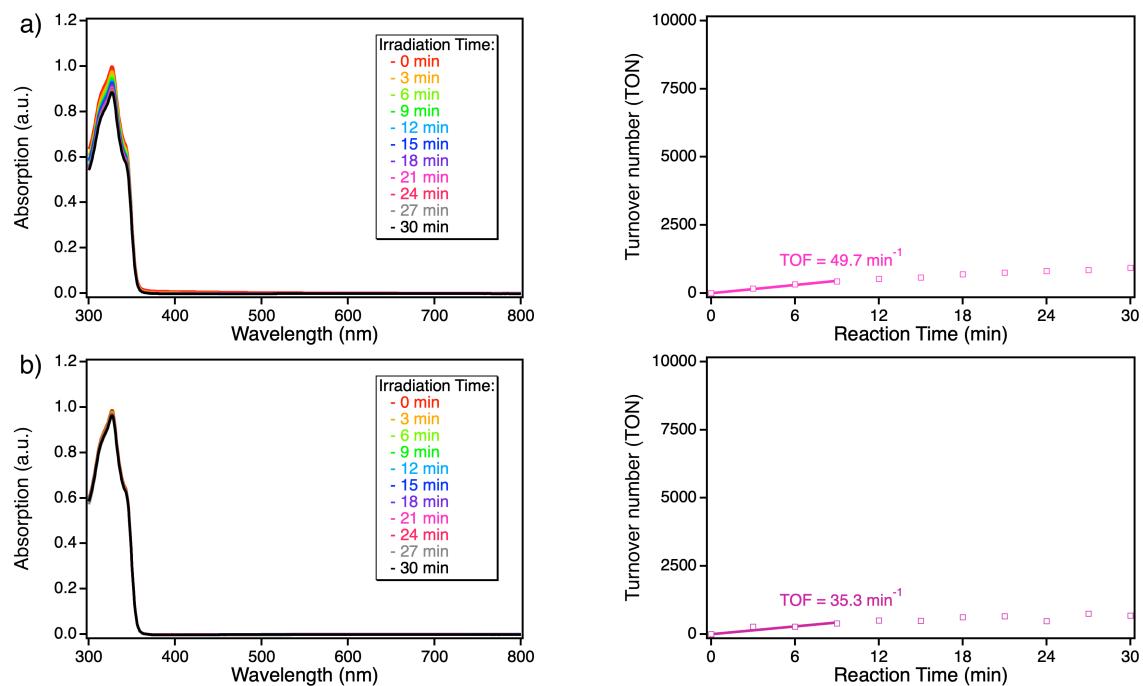

**Fig. S9:** UV-Vis spectra for the photooxidation of DPF with (a) **H9** as hybrid photocatalyst or (b) the photosensitizer BsubPc-11 (**9**,  $1 \times 10^{-10}$  mol) in solution.

### References:

- [1] D. Steinebrunner, G. Schnurpfeil, A. Wichmann, D. Wöhrle and A. Wittstock, Synergistic Effect in Zinc Phthalocyanine – Nanoporous Gold Hybrid Materials for Enhanced Photocatalytic Oxidations, *Catalysts*, 2019, **9**, 555.
